# Supplementary material for: A combined molecular dynamics simulation and quantum chemical study on the mechanism for activation of the OxyR transcription factor by hydrogen peroxide
Source: Royal Society of Chemistry journal article supplement (doi:10.1039/b604602a), 2006-01-01
Supplement: b604602a.pdf [file b604602a.pdf]

**Electronic Supplementary Information:**

**A combined molecular dynamics simulation and quantum chemical study on the mechanism for activation of the OxyR transcription factor by hydrogen peroxide**

Juraj Kóňa <sup>a,b</sup> and Tore Brinck <sup>\*a</sup>

<sup>a</sup> Physical Chemistry, Royal Institute of Technology, SE-10044 Stockholm, Sweden

<sup>b</sup> Institute of Chemistry, Slovak Academy of Sciences, Dúbravská cesta 9, SK-845 38 Bratislava, Slovak Republic

\* Correspondence to: Tore Brinck, Physical Chemistry, Royal Institute of Technology, SE-10044 Stockholm, Sweden

fax: +46-8-7908207

e-mail: [tore@physchem.kth.se](mailto:tore@physchem.kth.se)

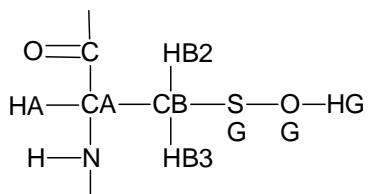

**Table S1** Atom types and charges derived for the sulfenic acid (CYA) residue.

| Atom name | Atom type | Charge  |
|-----------|-----------|---------|
| N         | N         | -0.4157 |
| H         | H         | 0.2719  |
| CA        | CT        | 0.0429  |
| HA        | H1        | 0.0766  |
| CB        | CT        | -0.0790 |
| HB2       | H1        | 0.0910  |
| HB3       | H1        | 0.0910  |
| SG        | S         | -0.1081 |
| OG        | OH        | -0.4500 |
| HG        | HO        | 0.4500  |
| C         | C         | 0.5973  |
| O         | O         | -0.5679 |

**Table S2** Bond (BOND), angle (ANGLE), dihedral (DIHE) and van der Waals (NONB) parameters for the CYA residue.

| <b>BOND</b>  |       |        |     |      |
|--------------|-------|--------|-----|------|
| S-OH         | 230.0 | 1.678  |     |      |
| OH-HO        | 553.0 | 0.960  |     |      |
| <b>ANGLE</b> |       |        |     |      |
| CT-S-OH      | 68.0  | 103.0  |     |      |
| S-OH-HO      | 55.0  | 108.5  |     |      |
| <b>DIHE</b>  |       |        |     |      |
| CT-S-OH-HO   | 1.0   | 3.5    | 0.0 | -2.0 |
| CT-S-OH-HO   | 1.0   | 0.6    | 0.0 | 3.0  |
| <b>NONB</b>  |       |        |     |      |
| S            | 2.000 | 0.250  |     |      |
| OH           | 1.721 | 0.2104 |     |      |
| HO           | 0.0   | 0.0    |     |      |

**Table S3** The RMSD of the C $\alpha$  carbons of OxyR during 1 ns (**MD\_1**, **MD\_2**, **MD\_4** and **MD\_5**) and during 4 ns MD simulations (**MD\_3**).

|                                                                                | <b>MD_1</b>   | <b>MD_2</b>   | <b>MD_3</b>   | <b>MD_4</b>   | <b>MD_5</b>   |
|--------------------------------------------------------------------------------|---------------|---------------|---------------|---------------|---------------|
| C $\alpha$ carbons of all residues of OxyR (87-298)                            |               |               |               |               |               |
| RMSD                                                                           | 1.4 $\pm$ 0.2 | 1.6 $\pm$ 0.3 | 1.4 $\pm$ 0.2 | 1.2 $\pm$ 0.2 | 1.6 $\pm$ 0.3 |
| average                                                                        |               |               |               |               |               |
| min                                                                            | 0.6           | 0.7           | 0.6           | 0.6           | 0.6           |
| max                                                                            | 2.3           | 2.2           | 2.0           | 1.6           | 2.1           |
| C $\alpha$ carbons of residues of the redox-active loop of OxyR (189-225)      |               |               |               |               |               |
| average                                                                        | 1.1 $\pm$ 0.2 | 1.1 $\pm$ 0.2 | 1.3 $\pm$ 0.4 | 1.2 $\pm$ 0.2 | 1.5 $\pm$ 0.5 |
| min                                                                            | 0.5           | 0.5           | 0.5           | 0.4           | 0.4           |
| max                                                                            | 1.8           | 1.8           | 2.6           | 1.8           | 2.5           |
| C $\alpha$ carbons of all residues but the redox-active loop (87-188, 226-298) |               |               |               |               |               |
| average                                                                        | 1.3 $\pm$ 0.3 | 1.5 $\pm$ 0.4 | 1.2 $\pm$ 0.2 | 1.1 $\pm$ 0.1 | 1.5 $\pm$ 0.2 |
| min                                                                            | 0.5           | 0.7           | 0.5           | 0.6           | 0.5           |
| max                                                                            | 2.2           | 2.3           | 1.8           | 1.5           | 1.9           |

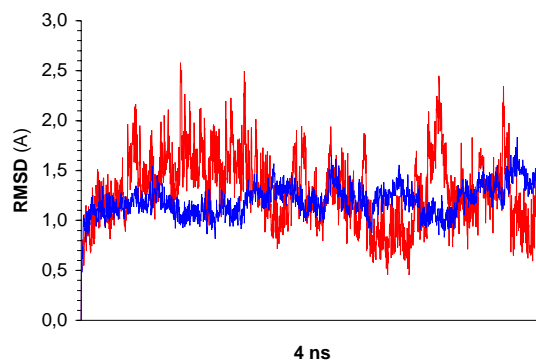

**Fig. S1** RMSD (in Å) of C $\alpha$  carbons of reduced form of OxyR with ionized Cys199 (MD\_3, HIP198-CYM199-CYS208) during the 4 ns MD simulation. (red line - C $\alpha$  carbons of redox-active loop, blue line - other C $\alpha$  carbons).

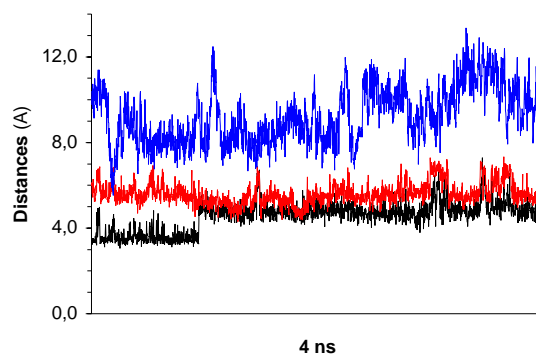

**Fig. S2** Distances  $d(\text{Cys199-S}\gamma\text{...S}\gamma\text{-Cys208})$  (black),  $d(\text{Cys199-S}\gamma\text{...N}\delta\text{1-His198})$  (red) and  $d(\text{Cys199-S}\gamma\text{...C}\zeta\text{-Arg220})$  (blue) in Å in the reduced form of OxyR (with configuration HIP198-CYM199-CYS208) during the 4 ns simulations (**MD\_3**).

**Table S4** Total energies ( $E$ ), ZPE corrections ( $ZPE$ ), thermal corrections to enthalpy ( $H$ ) and Gibbs free energy ( $G$ ) for the first redox step (reaction of Cys199 of the OxyR with hydrogen peroxide) in the gas phase in a.u. [B3LYP/6-31(+S)G(d)]

|            | $E$        | $ZPE$  | $H$    | $G$    |
|------------|------------|--------|--------|--------|
| <b>1</b>   | -1022.2760 | 0.2397 | 0.2597 | 0.1885 |
| <b>2TS</b> | -1022.2507 | 0.2389 | 0.2584 | 0.1886 |
| <b>3</b>   | -1022.3662 | 0.2399 | 0.2601 | 0.1867 |

**Table S5** Total energies ( $E$ ) for the first redox step (reaction of Cys199 of the OxyR with hydrogen peroxide) in the gas phase and aqueous solution in a.u.

|            | $E^a$      | $E^b$      | $E^c$      |
|------------|------------|------------|------------|
| <b>1</b>   | -1022.3486 | -1019.9749 | -1022.4289 |
| <b>2TS</b> | -1022.3240 | -1019.9508 | -1022.4066 |
| <b>3</b>   | -1022.4461 | -1020.0872 | -1022.5201 |

<sup>a</sup> B3LYP/6-31+G(d,p)//B3LYP/6-31(+S)G(d). <sup>b</sup> MP2/6-31+G(d,p)//B3LYP/6-

31(+S)G(d). <sup>c</sup> PCM-B3LYP/6-31+G(d,p)//B3LYP/6-31(+S)G(d).



**Table S6** Total energies ( $E$ ), ZPE corrections ( $ZPE$ ), thermal corrections to enthalpy ( $H$ ) and Gibbs free energy ( $G$ ) for the proton-transfer reaction (deprotonation of Cys208 by His198) and the second redox step (reaction of Cys199-S-OH with Cys208 of the OxyR) in the gas phase in a.u. [B3LYP/6-31(+S)G(d)]

|            | $E$        | $ZPE$  | $H$    | $G$    |
|------------|------------|--------|--------|--------|
| <b>4</b>   | -1461.0708 | 0.2879 | 0.3139 | 0.2230 |
| <b>5TS</b> | -1461.0659 | 0.2853 | 0.3107 | 0.2218 |
| <b>6</b>   | -1461.0667 | 0.2887 | 0.3142 | 0.2242 |
| <b>7</b>   | -1461.0665 | 0.2903 | 0.3156 | 0.2281 |
| <b>8TS</b> | -1461.0488 | 0.2906 | 0.3150 | 0.2326 |
| <b>9</b>   | -1461.0877 | 0.2895 | 0.3160 | 0.2249 |

**Table S7** Total energies ( $E$ ) for the proton-transfer reaction (deprotonation of Cys208 by His198) and the second redox step (reaction of Cys199-S-OH with Cys208 of the OxyR) in the gas phase and aqueous solution in a.u.

|            | $E^a$       | $E^b$      | $E^c$      |
|------------|-------------|------------|------------|
| <b>4</b>   | -1461.1569  | -1458.0841 | -1461.2229 |
| <b>5TS</b> | -1461.1528  | -1458.0780 | -1461.2229 |
| <b>6</b>   | -1461.15311 | -1458.0775 | -1461.2242 |
| <b>7</b>   | -1461.1534  | -1458.0770 | -1461.2250 |
| <b>8TS</b> | -1461.1363  | -1458.0610 | -1461.2094 |
| <b>9</b>   | -1461.1811  | -1458.1078 | -1461.2556 |

<sup>a</sup> B3LYP/6-31+G(d,p)//B3LYP/6-31(+S)G(d). <sup>b</sup> MP2/6-31+G(d,p)//B3LYP/6-

31(+S)G(d). <sup>c</sup> PCM-B3LYP/6-31+G(d,p)//B3LYP/6-31(+S)G(d).

#B3LYP/6-31G(d) extrabasis opt freq

Complex 1

1,1  
7 -0.633167 -0.582110 -4.210011  
6 -0.531076 -0.587728 -2.870246  
7 0.760515 -0.589951 -2.561545  
6 1.509169 -0.585013 -3.718598  
6 0.634425 -0.581283 -4.766662  
8 -2.439707 -0.600376 -0.160002  
8 -1.702202 -0.845933 1.073359  
7 -1.529790 1.501694 2.670565  
6 -0.428581 1.920627 3.295843  
7 -0.531205 2.906747 4.214713  
7 0.759907 1.394771 3.016221  
16 1.250471 -0.523416 0.453030  
6 2.051517 -2.095945 0.998263  
1 0.292179 3.302921 4.642966  
1 -1.417952 3.117450 4.648561  
1 1.561522 1.616003 3.589605  
1 0.924783 0.778507 2.191108  
1 -1.550548 0.665368 2.063226  
1 -2.385272 2.030941 2.755886  
1 -0.734290 -0.880312 0.746890  
1 3.137771 -2.001907 0.928264  
1 1.785094 -2.316024 2.035387  
1 1.727221 -2.933921 0.375216  
1 -3.045639 -1.362336 -0.135009  
1 -1.339888 -0.587914 -2.148116  
1 1.097686 -0.584101 -1.530020  
1 2.587704 -0.584529 -3.701536  
1 0.794867 -0.578975 -5.833231  
1 -1.504042 -0.578039 -4.725739

S 0

SP 1 1.00

0.0405 1.0 1.0

\*\*\*\*

#B3LYP/6-31G(d) extrabasis opt=(ts,calcfc,noigentest) freq

Transition state 2TS

1,1

|    |           |           |           |
|----|-----------|-----------|-----------|
| 6  | -3.392808 | 0.327474  | 1.942201  |
| 6  | -3.403714 | 0.353246  | 3.305799  |
| 7  | -2.077886 | 0.302493  | 3.701255  |
| 6  | -1.282150 | 0.243730  | 2.621366  |
| 7  | -2.072353 | 0.258070  | 1.548600  |
| 8  | 1.673254  | 0.089802  | 1.775139  |
| 8  | 0.636972  | -0.054933 | 0.402036  |
| 16 | -1.020793 | 0.108738  | -1.460029 |
| 6  | -1.604400 | -1.636119 | -1.584615 |
| 7  | 3.048510  | 0.043516  | -1.056925 |
| 6  | 3.025495  | 0.080945  | -2.390591 |
| 7  | 1.870773  | -0.034920 | -3.042287 |
| 7  | 4.179435  | 0.232975  | -3.072005 |
| 1  | 4.185311  | 0.334152  | -4.075947 |
| 1  | 5.071096  | 0.101707  | -2.617463 |
| 1  | 1.853982  | -0.158491 | -4.044536 |
| 1  | 0.957032  | 0.004447  | -2.548358 |
| 1  | 2.175214  | -0.077145 | -0.521774 |
| 1  | 3.854732  | 0.380841  | -0.550866 |
| 1  | 0.537780  | 0.910884  | 0.320064  |
| 1  | -2.142016 | -1.752461 | -2.530124 |
| 1  | -0.772860 | -2.345559 | -1.564672 |
| 1  | -2.293330 | -1.882227 | -0.770709 |
| 1  | 1.805480  | -0.870055 | 1.876298  |
| 1  | -0.192242 | 0.196719  | 2.605011  |
| 1  | -1.720184 | 0.242861  | 0.551644  |
| 1  | -4.200810 | 0.351096  | 1.228065  |
| 1  | -4.216018 | 0.400866  | 4.013411  |
| 1  | -1.746189 | 0.313008  | 4.657605  |

S 0

SP 1 1.00

0.0405 1.0 1.0

\*\*\*\*

#B3LYP/6-31G(d) extrabasis opt freq

Intermediate 2

1,1

|    |           |           |           |
|----|-----------|-----------|-----------|
| 6  | -2.732820 | -0.004105 | 3.150861  |
| 6  | -2.851125 | 0.160704  | 4.504558  |
| 7  | -1.574184 | 0.429015  | 4.953581  |
| 6  | -0.742396 | 0.418474  | 3.882498  |
| 7  | -1.414474 | 0.158017  | 2.774300  |
| 8  | -0.084017 | -2.237234 | -1.254897 |
| 8  | -0.557695 | -0.049135 | 0.265823  |
| 16 | 0.646434  | 1.090886  | 0.003884  |
| 6  | -0.313607 | 2.501904  | -0.627381 |
| 7  | 1.007709  | -1.687762 | -3.672380 |
| 6  | 1.995586  | -0.819376 | -3.841799 |
| 7  | 2.331405  | 0.023717  | -2.857493 |
| 7  | 2.681817  | -0.774649 | -5.001186 |
| 1  | 3.243706  | 0.027467  | -5.245770 |
| 1  | 2.563160  | -1.489040 | -5.704393 |
| 1  | 3.220158  | 0.502786  | -2.874253 |
| 1  | 1.742858  | 0.157667  | -2.030345 |
| 1  | 0.599657  | -1.884932 | -2.728539 |
| 1  | 0.622617  | -2.175934 | -4.468922 |
| 1  | -0.373246 | -1.497098 | -0.665442 |
| 1  | 0.414015  | 3.284329  | -0.873174 |
| 1  | -0.873609 | 2.227468  | -1.524926 |
| 1  | -0.993189 | 2.878357  | 0.140472  |
| 1  | 0.319456  | -2.896934 | -0.672238 |
| 1  | 0.319709  | 0.603136  | 3.952691  |
| 1  | -0.867790 | 0.024859  | 1.244115  |
| 1  | -3.503634 | -0.227979 | 2.428071  |
| 1  | -3.698013 | 0.113627  | 5.171197  |
| 1  | -1.304843 | 0.605023  | 5.911721  |

S 0

SP 1 1.00

0.0405 1.0 1.0

\*\*\*\*

#B3LYP/6-31G(d) extrabasis opt freq

Intermediate 4

1,1

|    |           |           |           |
|----|-----------|-----------|-----------|
| 6  | -5.572017 | -0.114635 | -0.859440 |
| 7  | -4.635535 | 0.499750  | -0.053102 |
| 6  | -5.100717 | 1.712837  | 0.181635  |
| 7  | -6.294353 | 1.904688  | -0.439444 |
| 6  | -6.611034 | 0.741819  | -1.111209 |
| 16 | -1.926901 | -0.875608 | 1.119922  |
| 6  | -2.695007 | -1.704562 | 2.567395  |
| 7  | 0.338538  | -2.323620 | -0.925206 |
| 6  | 1.446070  | -1.635560 | -0.618740 |
| 7  | 1.395990  | -0.625286 | 0.251394  |
| 7  | 2.625935  | -1.953051 | -1.171971 |
| 8  | 4.162198  | 0.204359  | -0.033462 |
| 16 | 4.707898  | 1.378936  | -1.150815 |
| 6  | 4.195558  | 2.915187  | -0.329191 |
| 8  | 6.326918  | -0.317292 | 1.483728  |
| 1  | -1.908785 | -2.258161 | 3.085287  |
| 1  | -3.471448 | -2.400272 | 2.244580  |
| 1  | -3.113844 | -0.961151 | 3.247932  |
| 1  | -3.054365 | -0.260952 | 0.594608  |
| 1  | -5.439818 | -1.129730 | -1.205431 |
| 1  | -7.518364 | 0.638138  | -1.685912 |
| 1  | -6.851969 | 2.746962  | -0.411123 |
| 1  | -4.620618 | 2.472412  | 0.782325  |
| 1  | -0.540351 | -2.114556 | -0.446966 |
| 1  | 0.397446  | -3.180706 | -1.454950 |
| 1  | 2.671625  | -2.565458 | -1.972605 |
| 1  | 3.424811  | -1.352053 | -0.963751 |
| 1  | 0.532644  | -0.399067 | 0.735772  |
| 1  | 2.240194  | -0.077291 | 0.407965  |
| 1  | 4.922049  | 0.013275  | 0.583497  |
| 1  | 4.488831  | 3.720588  | -1.012980 |
| 1  | 3.111792  | 2.950129  | -0.191486 |
| 1  | 4.710960  | 3.059155  | 0.623882  |
| 1  | 7.148272  | -0.187123 | 0.984107  |
| 1  | 6.470911  | 0.128195  | 2.333020  |

S 0

SP 1 1.00

0.0405 1.0 1.0

\*\*\*\*

#B3LYP/6-31G(d) extrabasis opt=(ts,noigentest,calcfc) freq

Transition state 5TS

1,1

|    |           |           |           |
|----|-----------|-----------|-----------|
| 6  | 3.017156  | 1.562641  | -4.542701 |
| 7  | 3.014000  | 1.553187  | -3.164918 |
| 6  | 4.272808  | 1.530978  | -2.757966 |
| 7  | 5.090577  | 1.525274  | -3.832410 |
| 6  | 4.314062  | 1.545180  | -4.975511 |
| 16 | 0.668970  | 1.611598  | -1.386248 |
| 6  | 0.442769  | 3.435963  | -1.240157 |
| 7  | -2.206439 | -0.015986 | -1.298127 |
| 6  | -2.233235 | -0.387225 | -0.011219 |
| 7  | -1.182818 | -0.152071 | 0.773926  |
| 7  | -3.316508 | -0.992818 | 0.506940  |
| 8  | -2.219937 | -1.587256 | 3.119140  |
| 16 | -1.955597 | -3.247188 | 3.424006  |
| 6  | -0.237362 | -3.229644 | 4.011767  |
| 8  | -3.399455 | -0.682815 | 5.373743  |
| 1  | -0.433600 | 3.640050  | -0.619433 |
| 1  | 0.283106  | 3.888574  | -2.222132 |
| 1  | 1.313204  | 3.895752  | -0.765274 |
| 1  | 1.977357  | 1.564350  | -2.386879 |
| 1  | 2.098813  | 1.580504  | -5.109651 |
| 1  | 4.746180  | 1.545554  | -5.963946 |
| 1  | 6.101682  | 1.510506  | -3.802100 |
| 1  | 4.605024  | 1.518429  | -1.730572 |
| 1  | -1.402218 | 0.529941  | -1.635785 |
| 1  | -3.062175 | 0.012070  | -1.832954 |
| 1  | -4.005156 | -1.405205 | -0.104796 |
| 1  | -3.247413 | -1.340159 | 1.464023  |
| 1  | -0.393493 | 0.390499  | 0.415512  |
| 1  | -1.190796 | -0.517683 | 1.722599  |
| 1  | -2.618766 | -1.199190 | 3.945492  |
| 1  | 0.021027  | -4.280771 | 4.186601  |
| 1  | 0.436070  | -2.824496 | 3.252098  |
| 1  | -0.133279 | -2.681102 | 4.951505  |
| 1  | -3.930029 | -1.375988 | 5.796912  |
| 1  | -2.873239 | -0.292099 | 6.088432  |

S 0

SP 1 1.00

0.0405 1.0 1.0

\*\*\*\*

#B3LYP/6-31G(d) extrabasis opt freq

Intermediate 6

|     |           |           |           |
|-----|-----------|-----------|-----------|
| 1,1 |           |           |           |
| 6   | 3.055016  | 1.413510  | -4.707765 |
| 7   | 3.048993  | 1.382184  | -3.330875 |
| 6   | 4.301380  | 1.355619  | -2.898612 |
| 7   | 5.120979  | 1.368439  | -3.965825 |
| 6   | 4.357677  | 1.404914  | -5.118853 |
| 16  | 0.675073  | 1.402867  | -1.498074 |
| 6   | 0.384299  | 3.215451  | -1.279771 |
| 7   | -2.237977 | -0.085199 | -1.283443 |
| 6   | -2.251734 | -0.374756 | 0.024707  |
| 7   | -1.168087 | -0.149178 | 0.764358  |
| 7   | -3.353684 | -0.886521 | 0.605676  |
| 8   | -2.222263 | -1.389360 | 3.230527  |
| 16  | -2.048709 | -3.035139 | 3.649596  |
| 6   | -0.299163 | -3.092721 | 4.133651  |
| 8   | -3.240995 | -0.260521 | 5.465373  |
| 1   | -0.488819 | 3.376422  | -0.640679 |
| 1   | 0.196075  | 3.701511  | -2.241147 |
| 1   | 1.244501  | 3.692202  | -0.801550 |
| 1   | 2.137104  | 1.385715  | -2.653729 |
| 1   | 2.138622  | 1.438630  | -5.276627 |
| 1   | 4.801527  | 1.421300  | -6.101758 |
| 1   | 6.132259  | 1.354760  | -3.925096 |
| 1   | 4.611164  | 1.327781  | -1.864977 |
| 1   | -1.412024 | 0.410198  | -1.657597 |
| 1   | -3.108489 | -0.019601 | -1.790700 |
| 1   | -4.068721 | -1.311905 | 0.034370  |
| 1   | -3.274717 | -1.182594 | 1.578698  |
| 1   | -0.366024 | 0.333731  | 0.341043  |
| 1   | -1.163821 | -0.455964 | 1.732814  |
| 1   | -2.558066 | -0.917936 | 4.040838  |
| 1   | -0.099835 | -4.141646 | 4.383049  |
| 1   | 0.349432  | -2.799633 | 3.304088  |
| 1   | -0.099068 | -2.477574 | 5.014850  |
| 1   | -3.785877 | -0.897644 | 5.953472  |
| 1   | -2.657427 | 0.137469  | 6.129701  |

S 0

SP 1 1.00

0.0405 1.0 1.0

\*\*\*\*



#B3LYP/6-31G(d) extrabasis opt freq

Intermediate 7

|     |           |           |           |
|-----|-----------|-----------|-----------|
| 1,1 |           |           |           |
| 16  | 0.104886  | 0.120415  | -0.781202 |
| 16  | 0.116507  | 0.151912  | 3.422329  |
| 8   | 1.205296  | 0.129531  | 2.107259  |
| 7   | 2.504414  | -2.095826 | 1.399480  |
| 6   | 2.207109  | -2.502690 | 0.168075  |
| 7   | 2.942560  | -3.597040 | -0.082786 |
| 6   | 3.727969  | -3.892627 | 1.019218  |
| 6   | 3.446059  | -2.938766 | 1.952886  |
| 6   | 1.368174  | 1.198117  | -1.601323 |
| 7   | -2.537093 | 1.830709  | -1.774258 |
| 6   | -2.818255 | 1.142272  | -2.877069 |
| 7   | -2.041166 | 0.107226  | -3.223083 |
| 7   | -3.879316 | 1.487498  | -3.633020 |
| 1   | 1.461636  | 2.153727  | -1.078496 |
| 1   | 1.083989  | 1.398302  | -2.639333 |
| 1   | 2.350161  | 0.714875  | -1.609811 |
| 1   | -0.093722 | 1.862293  | 5.038345  |
| 1   | 0.257667  | 2.584505  | 3.445159  |
| 1   | 1.572435  | 1.829764  | 4.407546  |
| 1   | 0.704666  | 0.287524  | 1.240207  |
| 1   | 2.051338  | -1.237253 | 1.821976  |
| 1   | 1.495501  | -1.991985 | -0.483201 |
| 1   | 2.919251  | -4.118388 | -0.949581 |
| 1   | 4.400975  | -4.734938 | 1.039530  |
| 1   | 3.831888  | -2.793952 | 2.949499  |
| 1   | -2.367989 | -0.565729 | -3.900765 |
| 1   | -1.292972 | -0.166028 | -2.561465 |
| 1   | -1.762600 | 1.501699  | -1.177046 |
| 1   | -3.074175 | 2.663739  | -1.556483 |
| 1   | -4.388701 | 2.333868  | -3.386494 |
| 1   | -3.956535 | 1.139909  | -4.577247 |
| 6   | 0.516454  | 1.774906  | 4.131683  |
| 8   | -4.726664 | 3.805476  | -2.102976 |
| 1   | -4.655953 | 4.745497  | -2.333451 |
| 1   | -5.519057 | 3.740051  | -1.546350 |

S 0

SP 1 1.00

0.0405 1.0 1.0

\*\*\*\*

#B3LYP/6-31G(d) extrabasis opt=(ts,calcfc,noeigentest) freq

Transition state 8TS

1,1

|    |           |           |           |
|----|-----------|-----------|-----------|
| 6  | 1.978801  | -0.054541 | 2.739537  |
| 7  | 1.923676  | -0.140493 | 4.076913  |
| 6  | 3.202828  | -0.221878 | 4.599650  |
| 6  | 4.049938  | -0.183825 | 3.532177  |
| 7  | 3.269362  | -0.080817 | 2.397341  |
| 8  | 3.765999  | 0.208189  | -0.318908 |
| 16 | 1.977853  | 0.165325  | -0.504141 |
| 16 | -0.818728 | -0.193035 | 0.221455  |
| 6  | -0.599391 | -2.025097 | 0.204105  |
| 6  | 1.811848  | 1.841815  | -1.202000 |
| 7  | -2.798308 | 0.011647  | -2.371960 |
| 6  | -3.965948 | 0.164806  | -1.753125 |
| 7  | -5.086424 | 0.376657  | -2.473429 |
| 7  | -4.012066 | 0.109747  | -0.416099 |
| 1  | -5.989422 | 0.239797  | -2.043880 |
| 1  | -5.021898 | 0.306737  | -3.486870 |
| 1  | -4.818729 | 0.460341  | 0.079309  |
| 1  | -3.108557 | 0.026294  | 0.084229  |
| 1  | -2.773768 | -0.034502 | -3.385273 |
| 1  | -1.943714 | -0.038838 | -1.790900 |
| 1  | -1.101788 | -2.482083 | -0.654523 |
| 1  | -1.000671 | -2.474365 | 1.117387  |
| 1  | 0.467351  | -2.273278 | 0.135978  |
| 1  | 0.741568  | 2.039092  | -1.286482 |
| 1  | 2.274798  | 1.890810  | -2.190523 |
| 1  | 2.270768  | 2.577612  | -0.537053 |
| 1  | 3.610940  | -0.027638 | 1.411881  |
| 1  | 5.126877  | -0.218581 | 3.486694  |
| 1  | 3.392254  | -0.296869 | 5.658492  |
| 1  | 1.061862  | -0.142558 | 4.607978  |
| 1  | 1.129187  | 0.019564  | 2.059315  |
| 1  | 4.145437  | -0.378025 | -0.995524 |
| 8  | -3.910560 | 0.056287  | -5.122842 |
| 1  | -4.000918 | -0.728409 | -5.686620 |
| 1  | -3.793229 | 0.797597  | -5.738054 |

S 0

SP 1 1.00

0.0405 1.0 1.0

\*\*\*\*

#B3LYP/6-31G(d) extrabasis opt freq

Product 9

1,1  
6 5.028333 -1.148546 -1.537729  
7 4.842076 -0.177805 -0.575576  
6 5.973164 0.499225 -0.523918  
7 6.879330 0.005995 -1.410030  
6 6.287887 -1.052674 -2.068614  
16 0.220073 0.433230 -0.113081  
6 0.444296 2.254199 -0.043251  
16 -1.676327 0.279902 -1.014709  
6 -1.380472 0.290712 -2.826194  
7 -4.384572 0.151732 1.079225  
6 -4.265761 -1.115401 1.482212  
7 -5.062403 -1.564172 2.462703  
7 -3.370521 -1.926512 0.904375  
8 -6.567562 0.875131 2.866851  
1 4.247314 -1.852968 -1.785729  
1 6.804768 -1.618741 -2.828050  
1 7.817365 0.350830 -1.557423  
1 6.180505 1.337472 0.126274  
1 1.383285 2.382623 0.497947  
1 -0.376201 2.722869 0.504076  
1 0.527914 2.677409 -1.046452  
1 -2.350770 0.125869 -3.304898  
1 -0.692360 -0.511224 -3.099617  
1 -0.982350 1.258207 -3.138211  
1 -5.760775 -0.934007 2.853985  
1 -5.108134 -2.546875 2.686758  
1 -3.153322 -2.825198 1.309866  
1 -2.727148 -1.552753 0.204295  
1 -3.729264 0.543304 0.409331  
1 -5.096082 0.740624 1.505968  
1 -7.483958 1.017585 2.579222  
1 -6.452347 1.450267 3.640684  
8 2.726041 0.602665 1.138778  
1 2.716113 -0.080959 1.824510  
1 3.415626 0.293431 0.497164

S 0

SP 1 1.00

0.0405 1.0 1.0

\*\*\*\*
